# Supplementary material for: The promoting effect of support pretreatment with sulfate acid on the Ca resistance of a CeO2/ZrO2 catalyst for NH3-SCR of NOx with NH3
Source: Royal Society of Chemistry journal article supplement (doi:10.1039/d2nj02919g), 2022-01-01
Supplement: d2nj02919g1.pdf [file d2nj02919g1.pdf]

## Supporting information

### **The promoting effect of support pretreatment with sulfate acid on Ca resistance of CeO<sub>2</sub>/ZrO<sub>2</sub> catalyst for NH<sub>3</sub>-SCR of NO<sub>x</sub> with NH<sub>3</sub>**

Chenglong Li<sup>a</sup>, Zhitao Han<sup>a\*</sup>, Xinxin Wang<sup>a</sup>, Yu Gao<sup>a</sup>, Zhen Wang<sup>a</sup>, Xinxiang Pan<sup>a,b</sup>

a. Marine Engineering College, Dalian Maritime University, Dalian 116026, China;

b. School of Electronic and Information Technology, Guangdong Ocean University,

Zhanjiang 524088, China

Correspondence information: Dr. Zhitao Han, Dalian Maritime University, No.1,

Linghai Road, Dalian 116026, China, hanzt@dlnu.edu.cn

Table. S1 Summary of literature data on NH<sub>3</sub>-SCR catalysts over alkali metal poisoned

| Catalysts                                                         | Preparation method                              | Reaction condition                                                                                                                  | Fresh catalysts<br>T <sub>80%</sub> , °C | Alkali metals precursor<br>and load             | Poisoned catalysts    |                               | Ref          |
|-------------------------------------------------------------------|-------------------------------------------------|-------------------------------------------------------------------------------------------------------------------------------------|------------------------------------------|-------------------------------------------------|-----------------------|-------------------------------|--------------|
|                                                                   |                                                 |                                                                                                                                     |                                          |                                                 | T <sub>80%</sub> , °C | Max NO <sub>x</sub><br>Con, % |              |
| CeO <sub>2</sub> /ZrO <sub>2</sub> -S                             | Precipitation<br>(ZrO <sub>2</sub> )            | [NO] = [NH <sub>3</sub> ] = 500 ppm,<br>[O <sub>2</sub> ] = 5 vol. %, N <sub>2</sub> as balance<br>GHSV = 60,000 h <sup>-1</sup>    | 245-500                                  | (Ca(NO <sub>3</sub> ) <sub>2</sub> ) 1 wt.% CaO | 255-490               | 100                           | This<br>work |
|                                                                   |                                                 |                                                                                                                                     |                                          | (Ca(NO <sub>3</sub> ) <sub>2</sub> ) 2 wt.% CaO | 280-480               | 100                           |              |
|                                                                   | (Ca(NO <sub>3</sub> ) <sub>2</sub> ) 5 wt.% CaO |                                                                                                                                     |                                          | -                                               | 30                    |                               |              |
| CeO <sub>2</sub> /SO <sub>4</sub> <sup>2-</sup> -ZrO <sub>2</sub> | Impregnation                                    | [NO] = [NH <sub>3</sub> ] = 500 ppm,<br>[O <sub>2</sub> ] = 3.5 vol. %, N <sub>2</sub> as balance<br>GHSV = 180,000 h <sup>-1</sup> | 360-545                                  | (KNO <sub>3</sub> ) K/Ce = 0.4                  | 325-530               | 100                           | 1            |
|                                                                   |                                                 |                                                                                                                                     |                                          | (KNO <sub>3</sub> ) K/Ce = 0.8                  | 375-475               | 86                            |              |
|                                                                   |                                                 |                                                                                                                                     |                                          | K/Ce was molar ratio                            | -                     | -                             |              |
| V-Ce(SO <sub>4</sub> ) <sub>2</sub> /Ti                           | Impregnation                                    | [NO] = [NH <sub>3</sub> ] = 500 ppm,<br>[O <sub>2</sub> ] = 3.5 vol. %, N <sub>2</sub> as balance<br>GHSV = 150,000 h <sup>-1</sup> | 275-450                                  | (NaHCO <sub>3</sub> ) 0.5 wt.% Na               | -                     | 80                            | 2            |
| V <sub>2</sub> O <sub>5</sub> -WO <sub>3</sub> /TiO <sub>2</sub>  | Impregnation                                    | [NO] = [NH <sub>3</sub> ] = 500 ppm,<br>[O <sub>2</sub> ] = 3 vol. %, N <sub>2</sub> as balance<br>GHSV = 240,000 h <sup>-1</sup>   | 280-500                                  | (CaO) 2 wt.% CaO                                | -                     | 63                            | 3            |
|                                                                   |                                                 |                                                                                                                                     |                                          | (CaCO <sub>3</sub> ) 2 wt.% CaO                 | -                     | 55                            |              |
|                                                                   |                                                 |                                                                                                                                     |                                          | (CaSO <sub>4</sub> ) 2 wt.% CaO                 | 325-480               | 90                            |              |
| V <sub>2</sub> O <sub>5</sub> -WO <sub>3</sub> /TiO <sub>2</sub>  | Impregnation                                    | [NO] = [NH <sub>3</sub> ] = 500 ppm,<br>[O <sub>2</sub> ] = 3 vol. %, N <sub>2</sub> as balance<br>GHSV = 70,000 h <sup>-1</sup>    | 240-500                                  | (Ca(OH) <sub>2</sub> ) 0.1 wt.% CaO             | 265-500               | 100                           | 4            |
|                                                                   |                                                 |                                                                                                                                     |                                          | (Ca(OH) <sub>2</sub> ) 0.5 wt.% CaO             | 280-500               | 100                           |              |
|                                                                   |                                                 |                                                                                                                                     |                                          | (Ca(OH) <sub>2</sub> ) 1 wt.% CaO               | 290-500               | 100                           |              |
|                                                                   |                                                 |                                                                                                                                     |                                          | (Ca(OH) <sub>2</sub> ) 2 wt.% CaO               | -                     | 56                            |              |

|                                                                                        |                                        |                                                                                                                                     |         |                                                                                                                     |                               |                      |    |
|----------------------------------------------------------------------------------------|----------------------------------------|-------------------------------------------------------------------------------------------------------------------------------------|---------|---------------------------------------------------------------------------------------------------------------------|-------------------------------|----------------------|----|
| V <sub>2</sub> O <sub>5</sub> -WO <sub>3</sub> /TiO <sub>2</sub>                       | Impregnation                           | [NO] = [NH <sub>3</sub> ] = 500 ppm,<br>[O <sub>2</sub> ] = 5 vol. %, N <sub>2</sub> as balance<br>GHSV = 100,000 h <sup>-1</sup>   | 225-400 | (Ca(NO <sub>3</sub> ) <sub>2</sub> )<br>The molar ratio of Ca/V<br>was 1:1                                          | -                             | 73                   | 5  |
| V <sub>2</sub> O <sub>5</sub> -WO <sub>3</sub> -CeO <sub>2</sub> /<br>TiO <sub>2</sub> | Impregnation                           | [NO] = [NH <sub>3</sub> ] = 500 ppm,<br>[O <sub>2</sub> ] = 5 vol. %, N <sub>2</sub> as balance<br>GHSV = 100,000 h <sup>-1</sup>   | 180-400 | (Ca(NO <sub>3</sub> ) <sub>2</sub> )<br>The molar ratio of Ca/V<br>was 1:1                                          | 240-400                       | 96                   | 6  |
| CeO <sub>2</sub> -WO <sub>3</sub>                                                      | Impregnation<br>Urea as<br>precipitant | [NO] = [NH <sub>3</sub> ] = 500 ppm,<br>[O <sub>2</sub> ] = 3 vol. %, N <sub>2</sub> as balance<br>GHSV = 120,000 h <sup>-1</sup>   | 195-450 | (Ca(OH) <sub>2</sub> ) 1 wt.% CaO<br>(Ca(OH) <sub>2</sub> ) 3 wt.% CaO<br>(Ca(OH) <sub>2</sub> ) 5 wt.% CaO         | 220-450<br>245-450<br>290-400 | 100<br>95<br>85      | 7  |
| Ce/TiO <sub>2</sub>                                                                    | Sol-gel                                | [NO] = [NH <sub>3</sub> ] = 600 ppm,<br>[O <sub>2</sub> ] = 3 vol. %, Ar as balance<br>GHSV = 108,000 h <sup>-1</sup>               | 210-400 | (Ca(NO <sub>3</sub> ) <sub>2</sub> )<br>The molar ratio of Ca/Ce<br>was 0.05:1                                      | -                             | 64                   | 8  |
| Ce/TiO <sub>2</sub>                                                                    | Impregnation                           | [NO] = [NH <sub>3</sub> ] = 600 ppm,<br>[O <sub>2</sub> ] = 3.5 vol. %, N <sub>2</sub> as balance<br>GHSV = 100,000 h <sup>-1</sup> | -       | (Ca(NO <sub>3</sub> ) <sub>2</sub> )<br>The molar ratio of Ca/Ce<br>was x:1(x=0.25, 0.5, 1<br>and 2)                | -                             | 40<br>16<br>10<br>18 | 9  |
| CeO <sub>2</sub> -Nb <sub>2</sub> O <sub>5</sub> -TiO <sub>2</sub>                     | Sol-gel                                | [NO] = [NH <sub>3</sub> ] = 1000 ppm,<br>[O <sub>2</sub> ] = 3 vol. %, N <sub>2</sub> as balance<br>GHSV = 90,000 h <sup>-1</sup>   | 230-490 | (KNO <sub>3</sub> )<br>The molar ratio of K/Ce<br>was 0.2:1                                                         | 295-425                       | 85                   | 10 |
| Ce/TNTs-eth                                                                            | Impregnation                           | [NO] = [NH <sub>3</sub> ] = 600 ppm,<br>[O <sub>2</sub> ] = 3.5 vol. %, N <sub>2</sub> as balance<br>GHSV = 100,000 h <sup>-1</sup> | 270-500 | (KNO <sub>3</sub> ) K/Ce=0.25<br>(Ca(NO <sub>3</sub> ) <sub>2</sub> ) Ca/Ce=0.25<br>(NaNO <sub>3</sub> ) Na/Ce=0.25 | 330-440<br>310-470<br>295-470 | 88<br>96<br>98       | 11 |

|                        |               |                                                                                                                                   |         |                                                       |         |     |    |
|------------------------|---------------|-----------------------------------------------------------------------------------------------------------------------------------|---------|-------------------------------------------------------|---------|-----|----|
| Mn-Ce-Ti               | Precipitation | [NO] = [NH <sub>3</sub> ] = 500 ppm,<br>[O <sub>2</sub> ] = 3 vol. %, N <sub>2</sub> as balance<br>GHSV = 18,000 h <sup>-1</sup>  | 150-330 | (Ca(OH) <sub>2</sub> ) 2 wt.% Ca                      | -       | 80  | 12 |
|                        |               |                                                                                                                                   |         | (CaCl <sub>2</sub> ) 2 wt.% Ca                        | -       | 77  |    |
| Mn/TiO <sub>2</sub>    | Impregnation  | [NO] = [NH <sub>3</sub> ] = 1000 ppm,<br>[O <sub>2</sub> ] = 3 vol. %, N <sub>2</sub> as balance<br>GHSV = 75,000 h <sup>-1</sup> | 100-200 | (Ca(NO <sub>3</sub> ) <sub>2</sub> ) 0.5 wt.% Ca      | 125-200 | 100 | 13 |
|                        |               |                                                                                                                                   |         | (Ca(NO <sub>3</sub> ) <sub>2</sub> ) 1 wt.% Ca        | 147-200 | 100 |    |
|                        |               |                                                                                                                                   |         | (Ca(NO <sub>3</sub> ) <sub>2</sub> ) 3 wt.% Ca        | 136-200 | 100 |    |
|                        |               |                                                                                                                                   |         | (Ca(NO <sub>3</sub> ) <sub>2</sub> ) 5 wt.% Ca        | 147-200 | 97  |    |
| Fe-Ce/TiO <sub>2</sub> | Precipitation | [NO] = [NH <sub>3</sub> ] = 500 ppm,<br>[O <sub>2</sub> ] = 3 vol. %, N <sub>2</sub> as balance<br>GHSV = 18,000 h <sup>-1</sup>  | 220-360 | (Ca(NO <sub>3</sub> ) <sub>2</sub> ) 10 wt.% Ca       | 130-200 | 100 | 14 |
|                        |               |                                                                                                                                   |         | (Ca(OH) <sub>2</sub> ) 1 wt.% Ca                      | -       | 76  |    |
|                        |               |                                                                                                                                   |         | (Ca(OH) <sub>2</sub> ) 2 wt.% Ca                      | -       | 74  |    |
| Fe-Ce/TiO <sub>2</sub> | Precipitation | [NO] = [NH <sub>3</sub> ] = 500 ppm,<br>[O <sub>2</sub> ] = 3 vol. %, N <sub>2</sub> as balance<br>GHSV = 18,000 h <sup>-1</sup>  | 220-360 | (Ca(OH) <sub>2</sub> ) 3 wt.% Ca                      | -       | 64  | 15 |
|                        |               |                                                                                                                                   |         | (CaCO <sub>3</sub> ) 1 wt.% Ca                        | 250-360 | 90  |    |
|                        |               |                                                                                                                                   |         | (CaCO <sub>3</sub> ) 2 wt.% Ca                        | 265-360 | 89  |    |
| Zr-Cu/SZM-5            | Impregnation  | [NO] = [NH <sub>3</sub> ] = 500 ppm,<br>[O <sub>2</sub> ] = 3 vol. %, N <sub>2</sub> as balance<br>GHSV = 18,000 h <sup>-1</sup>  | 160-400 | (CaCO <sub>3</sub> ) 3 wt.% Ca                        | 270-360 | 88  | 16 |
|                        |               |                                                                                                                                   |         | (Ca(NO <sub>3</sub> ) <sub>2</sub> ) 1.26 wt.%<br>CaO | 170-400 | 100 |    |
|                        |               |                                                                                                                                   |         |                                                       |         |     |    |
| Cu-Ce/H-SPAO-3<br>4    | Impregnation  | [NO] = [NH <sub>3</sub> ] = 500 ppm,<br>[O <sub>2</sub> ] = 3 vol. %, N <sub>2</sub> as balance<br>GHSV = 30,000 h <sup>-1</sup>  | 180-360 | (Ca(NO <sub>3</sub> ) <sub>2</sub> ) 1 wt.% Ca        | 210-360 | 100 | 17 |
|                        |               |                                                                                                                                   |         | (KNO <sub>3</sub> ) 1 wt.% K                          | 210-360 | 100 |    |
|                        |               |                                                                                                                                   |         | (Pb(NO <sub>3</sub> ) <sub>2</sub> ) 1 wt.% Pb        | 200-360 | 100 |    |

## References

- 1 S. Gao, P. Wang, X. Chen, H. Wang, Z. Wu, Y. Liu and X. Weng, *Catal. Commun.*, 2014, **43**, 223-226.
- 2 W. Hu, Y. Zhang, S. Liu, C. Zheng, X. Gao, I. Nova and E. Tronconi, *Appl. Catal., B*, 2017, **206**, 449-460.
- 3 X. Li, X. Li, R. T. Yang, J. Mo, J. Li and J. Hao, *Mol. Catal.*, 2017, **434**, 16-24.
- 4 L. Chen, J. Li and M. Ge, *Chem. Eng. J.*, 2011, **170**, 531-537.
- 5 Y. Zheng, Y. Guo, J. Wang, L. Luo and T. Zhu, *J. Phys. Chem. C*, 2021, **125**, 6128-6136.
- 6 Y. Guo, X. Xu, H. Gao, Y. Zheng, L. Luo and T. Zhu, *Catal.*, 2021, **11**, 445-459.
- 7 X. Li, X. Li, J. Li and J. Hao, *Chem. Eng. J.*, 2017, **317**, 70-79.
- 8 S. Liu, R. Guo, S. Wang, W. Pan, P. Sun, M. Li and S. Liu, *J. Taiwan Inst. Chem. Eng.*, 2017, **78**, 290-298.
- 9 H. Wang, X. Chen, S. Gao, Z. Wu, Y. Liu and X. Weng, *Catal. Sci. Technol.*, 2013, **3**, 715-722.
- 10 Y. Jiang, D. Han, L. Yang, Z. Yang, H. Ge, R. Lin and X. Wang, *Process Saf. Environ. Protect.*, 2022, **160**, 876-886.
- 11 P. Wang, H. Wang, X. Chen, Y. Liu, X. Weng and Z. Wu, *J. Mater. Chem. A*, 2015, **3**, 680-690.
- 12 X. Wang, J. Zhou, J. Wang, A. Ding, K. Gui and H. R. Thomas, *React. Kinet. Mech. Catal.*, 2019, **129**, 153-164.
- 13 Y. Liu, T. Gu, Y. Wang, X. Weng and Z. Wu, *Catal. Commun.*, 2012, **18**, 106-109.

- 14 X. Wang, Q. Fang, J. Wang, K. Gui and H. R. Thomas, *React. Kinet. Mech. Catal.*, 2021, **133**, 245-258.
- 15 X. Wang, Q. Fang, J. Wang, K. Gui and H. R. Thomas, *RSC Adv*, 2020, **10**, 44876-44883.
- 16 H. Xue, T. Meng, F. Liu, X. Guo, S. Wang and D. Mao, *RSC Adv*, 2019, **9**, 38477-38485.
- 17 P. Wang, L. Yan, Y. Gu, S. Kuboon, H. Li, T. Yan, L. Shi and D. Zhang, *Environ. Sci. Technol.*, 2020, **54**, 6396-6405.

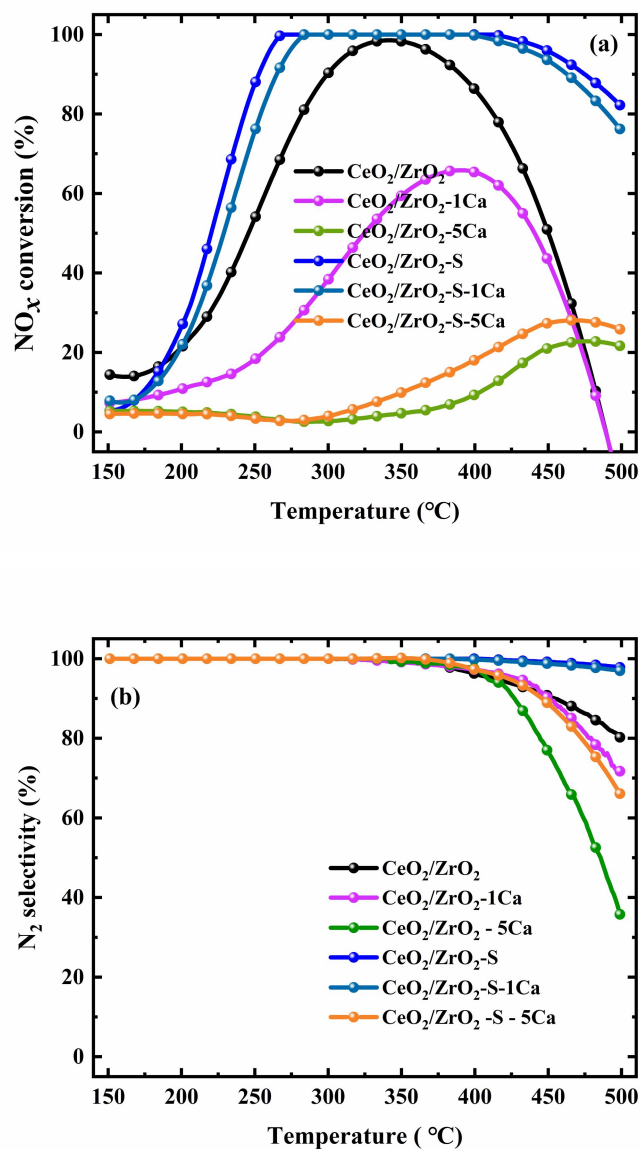

**Fig. S1.** SCR performance test results of CeO<sub>2</sub>/ZrO<sub>2</sub>, CeO<sub>2</sub>/ZrO<sub>2</sub>-1Ca, CeO<sub>2</sub>/ZrO<sub>2</sub>-5Ca, CeO<sub>2</sub>/ZrO<sub>2</sub>-S, CeO<sub>2</sub>/ZrO<sub>2</sub>-S-1Ca, CeO<sub>2</sub>/ZrO<sub>2</sub>-S-5Ca : (a), NO<sub>x</sub> conversion; (b), N<sub>2</sub> selectivity.

Reaction conditions: 0.5 mL catalyst, [NO] = [NH<sub>3</sub>] = 500 ppm, [O<sub>2</sub>] = 5 vol.%,

balance with N<sub>2</sub>, total flow rate = 500 mL min<sup>-1</sup> and GHSV = 60,000 h<sup>-1</sup>

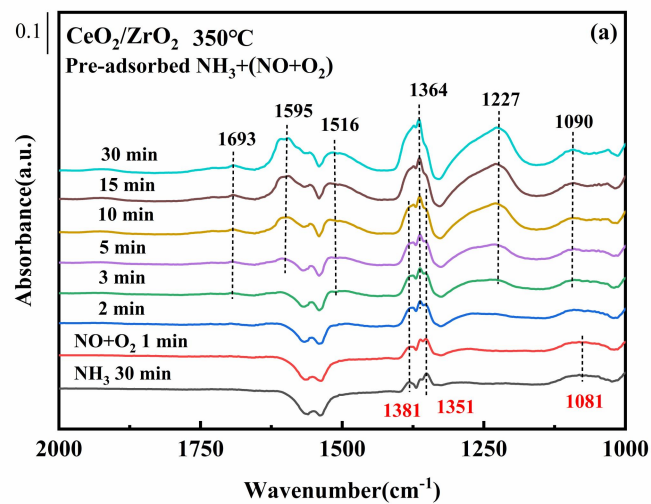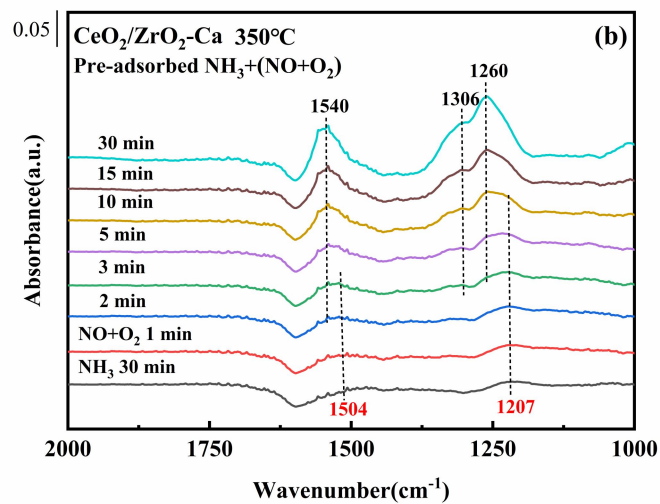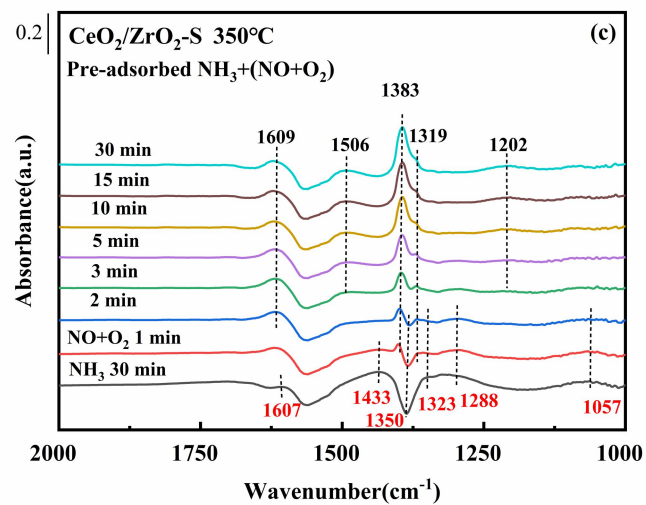



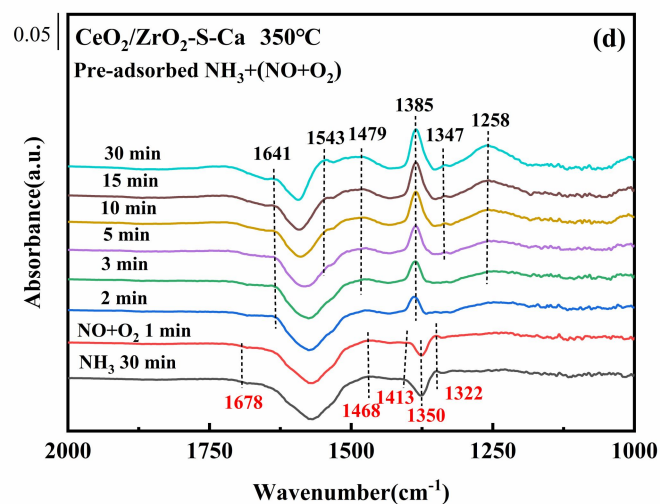

**Fig. S2.** In situ DRIFTS of reaction between  $\text{NO} + \text{O}_2$  and adsorbed  $\text{NH}_3$  species over (a)  $\text{CeO}_2/\text{ZrO}_2$ , (b)  $\text{CeO}_2/\text{ZrO}_2\text{-Ca}$ , (c)  $\text{CeO}_2/\text{ZrO}_2\text{-S}$  and (d)  $\text{CeO}_2/\text{ZrO}_2\text{-S-Ca}$  catalysts at 350 °C.

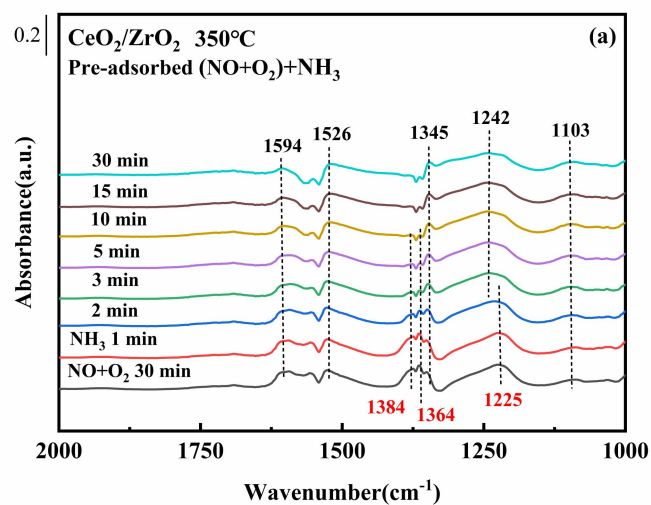

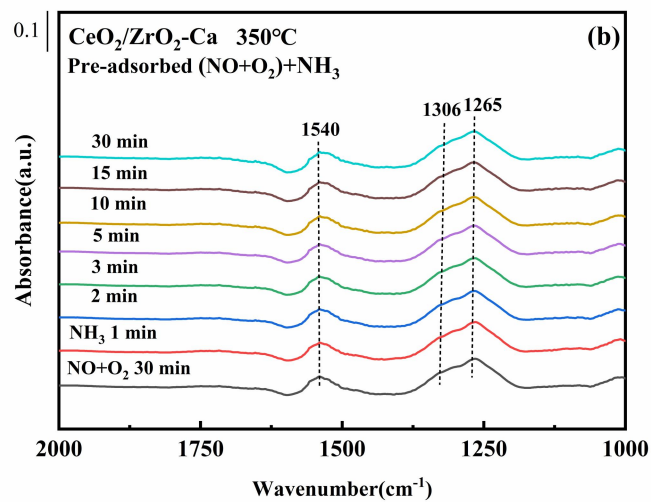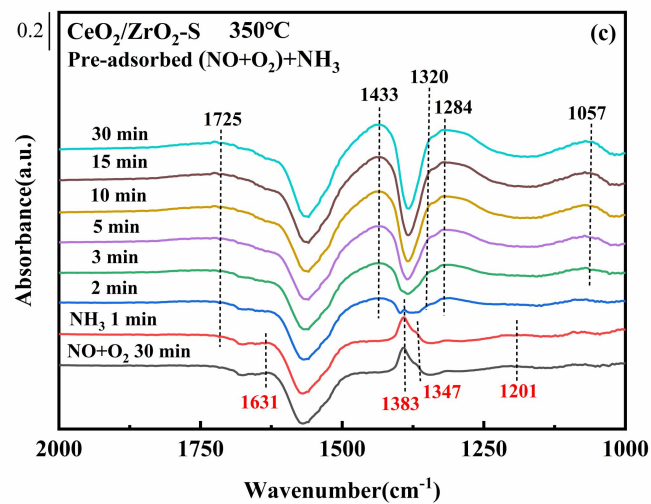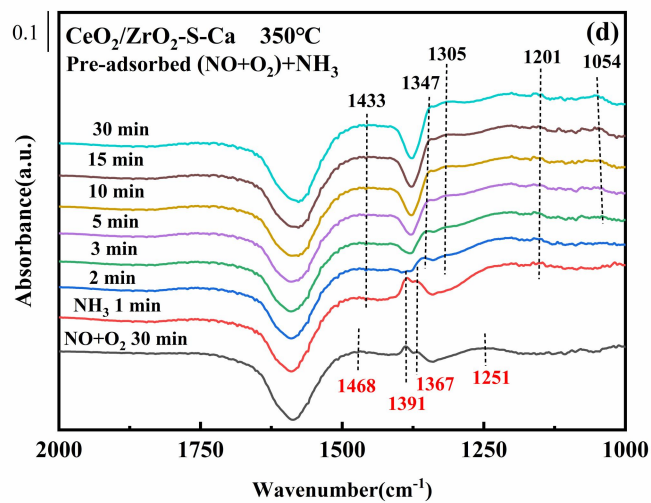

**Fig. S3.** In situ DRIFTS of reaction between  $\text{NH}_3$  and adsorbed  $\text{NO}+\text{O}_2$  species over (a)  $\text{CeO}_2/\text{ZrO}_2$ , (b)  $\text{CeO}_2/\text{ZrO}_2\text{-Ca}$ , (c)  $\text{CeO}_2/\text{ZrO}_2\text{-S}$  and (d)  $\text{CeO}_2/\text{ZrO}_2\text{-S-Ca}$  catalysts at 350 °C.
